---

# PREDICTION OF ALLOSTERIC SITES AND SIGNALLING: INSIGHTS FROM BENCHMARKING DATASETS

---

A PREPRINT

**Nan Wu**  
Department of Chemistry  
Imperial College London

**Léonie Strömich**  
Department of Chemistry  
Imperial College London

**Sophia N. Yaliraki\***  
Department of Chemistry  
Imperial College London  
[s.yaliraki@imperial.ac.uk](mailto:s.yaliraki@imperial.ac.uk)

August 18, 2021

## ABSTRACT

1 Allostery is a pervasive mechanism which regulates the activity of proteins in living systems through  
2 binding of a molecule at a distant site from the orthosteric site of the protein. The universality of  
3 allosteric regulation complemented by the benefits of highly specific, potentially non-toxic and protein  
4 activity modulating allosteric drugs makes uncovering allosteric sites on proteins invaluable for drug  
5 discovery. However, there are few computational methods to effectively predict them. Bond-to-bond  
6 propensity analysis, a recently developed method, has successfully predicted allosteric sites for a  
7 diverse group of proteins with only the knowledge of the orthosteric sites and the corresponding  
8 ligands in 19 of 20 cases. The method is based on an energy-weighted atomistic protein graph and  
9 allows for computationally highly efficient analysis in atomistic detail. We here extended the analysis  
10 onto 432 structures of 146 proteins from two existing benchmarking datasets for allosteric proteins:  
11 ASBench and CASBench. We further refined the metrics to account for the cumulative effect of  
12 residues with high propensities and the crucial residues in a given site with two additional measures.  
13 The allosteric site is recovered for 95/113 proteins (99/118 structures) from ASBench and 32/33  
14 proteins (304/314 structures) from CASBench, with the only *a priori* knowledge being the orthosteric  
15 site residues. Knowing the orthosteric ligands of the protein, the allosteric site is identified for 32/33  
16 proteins (308/314 structures) from CASBench.

## 17 1 Introduction

18 Proteins are ubiquitous in all aspects of cellular life where they fulfil crucial functions, while their malfunction could  
19 result in disease states [1, 2]. By 2017, 70% of small molecule drugs on the market targeted four types of proteins,  
20 namely protein kinases, ion channels, rhodopsin-like G protein-coupled receptors (GPCRs), and nuclear hormone  
21 receptors [3]. Most current small molecule drugs modify or inhibit the action of a protein by directly binding to the  
22 primary active site (also known as the orthosteric site) of the protein. The main advantage of this drug type is the high  
23 affinity and generally high specificity towards the orthosteric site as proved by a large number of successful drugs  
24 on the market [4]. Despite such advantages, the configuration of orthosteric sites is similar for proteins performing  
25 related functions and a low selectivity leads to off-target toxicity [5]. For instance, orthosteric sites for adenosine  
26 triphosphate (ATP) binding in different kinases are similar, thus making the optimisation of selective kinase inhibitor  
27 challenging [6]. In addition, prolonged exposure to the drugs results in drug resistance, through either modifications  
28 of the drug molecules [7] or changes to the orthosteric sites [8, 9, 10, 11, 12]. Moreover, orthosteric drugs act as  
29 complete inhibitors or activators rather than modulators of proteins and hence their therapeutic effect may not be the  
30 most optimal [10].

31 Modulation of protein activity, achieved through binding of small molecules at the allosteric site, is termed allosterism  
32 [4]. These binding events result in conformational changes of the targeted proteins and affect the binding of natural  
33 substrates to orthosteric sites. Conformational modification can enhance or reduce the binding affinity of natural  
34 substrates at orthosteric sites and can, therefore, lead to a controlled upregulation and downregulation of protein

35 activities which is difficult to achieve by orthosteric site binding [13]. Allosteric modulators therefore have a lower  
36 potential for adverse side effects. Once all the allosteric sites are fully occupied, the drug reaches saturation (a ceiling  
37 level) and there is no further pharmacological effect. This indicates that on-target safety can be guaranteed even with  
38 overdosing [14, 15]. Contributing to the low off-target effects of allosteric drugs is the low evolutionary pressure for  
39 allosteric sites to accommodate an endogenous substrate compared to the well-conserved orthosteric sites [16]. This  
40 would allow for highly selective drug targeting in closely related protein families by exploiting allostery.

41 The two main challenges for using allostery in drug development are finding suitable allosteric sites in the first place  
42 and designing molecules which bind and exert modulation effects. The design of allosteric site binders could follow  
43 well-established approaches used to develop molecules that bind to orthosteric sites, such as high-throughput screening  
44 [17], structure-based drug design [18] and peptide phage display [19]. To achieve a high specificity as well as the  
45 intended modulation, it is indispensable to search for unique allosteric sites for the targeted protein. Therefore, efficient  
46 and effective methods for identifying putative allosteric sites are of great interest to guide the rational design of allosteric  
47 modulators and contribute to the field of drug discovery and development [20].

48 Experimental methods including tethering [21, 22], nuclear magnetic resonance (NMR) [23, 24] and traditional  
49 high-throughput screening followed by X-ray crystallography [25, 26] have successfully led to the discovery of a  
50 few novel allosteric sites. All of these methods involve screening of huge compound libraries which is laborious and  
51 time-consuming. To circumvent the challenges associated with the experimental methods, numerous computational  
52 methods have been developed to predict allosteric sites (reviewed in [27, 28]) with various degrees of success. The  
53 continuous growth of the Allosteric Database (ASD) which contains data of 1949 allosteric proteins, their binding  
54 sites and other relevant information [29, 30, 31] and the construction of benchmarking datasets for allosteric proteins,  
55 ASBench [32] and CASBench [33], have provided comprehensive resources in aiding the identification of allosteric  
56 sites with computational methods.

57 There are two general ways of approaching the problem of identifying putative allosteric sites computationally: (1)  
58 identifying allosteric sites without considering the communication with orthosteric sites and (2) uncovering the allosteric-  
59 communication pathways between orthosteric and allosteric sites [34]. Several studies have followed the first approach:  
60 Huang *et al.* developed Allosite to find allosteric sites based on topological and physicochemical characteristics of  
61 allosteric and non-allosteric sites using a support vector machine (SVM) classifier [35], while Chen *et al.* built a random  
62 forest model which utilised calculated descriptors of orthosteric, allosteric and regular sites (binding sites without any  
63 function) and their bound ligands to classify potential sites on a given protein and identify putative allosteric sites [36].  
64 Similarly, not concentrating on cognate ligands, Fogha *et al.* performed computational analysis of the density and  
65 clustering of crystallisation additives which are used to stabilise proteins during the process of crystallisation [37].  
66 These methods, although achieving some promising predictability for putative allosteric sites, focus merely on the  
67 potential binding pockets on the proteins and do not consider the effects of binding at these sites on the protein, which  
68 is the key concept of allostery. Therefore, these approaches alone are not sufficient to identify potential allosteric  
69 sites. Molecular dynamics (MD) simulations and normal mode analysis (NMA) of elastic network models (ENM) are  
70 widely used within the second approach of identifying allosteric signalling paths based on protein dynamics described  
71 by Newton's equation of motion. MD simulations can be applied to model proteins at atomic resolution and aid the  
72 understanding of communication pathways in proteins [38, 39]. For example, Shukla *et al.* applied MD simulations to  
73 reveal the structures of intermediates of a non-receptor tyrosine kinase c-Src and analysed its activation pathways to  
74 discover inhibitory allosteric sites [40]. However, MD simulations require a vast amount of computational resources if  
75 applied at an atomistic level for large proteins [41] and conventional all-atom MD simulations are unable to access the  
76 timescales of ligand-binding processes of proteins [42]. To retain crucial characteristics of dynamics and alleviate high  
77 computational demands, ENM were introduced. Performing NMA of ENM on proteins can result in a good match  
78 to MD simulations [43, 44, 45]. Most available methods include NMA of ENM as the main component and use a  
79 perturbation approach to measure the response of the protein to ligand binding or unbinding [34], thereby predicting  
80 allosteric sites, such as PARS [46, 47]. The results obtained from NMA of ENM can be combined with machine  
81 learning for the identification of allosteric sites and have been applied in AlloPred [48] and AllositePro [49]. Guarnera  
82 and Berezovsky introduced a structure-based statistical mechanical model of allostery (SBSMMA) which differs from  
83 ENM [50] to predict allosteric sites [51]. Although both ENM and SBSMMA are successful in modelling proteins  
84 and require much less computational power than MD simulations, they have two inherent limitations – not providing  
85 atomistic details of the protein and not considering long-range interactions above a certain distance. ENM treats each  
86 residue as a mass and represents a protein as a network of masses connected by virtual strings if they are within a cutoff  
87 distance [52]. SBSMMA uses the coarse-grained representation of proteins based on  $C\alpha$  harmonic models and the  
88 allosteric potential is calculated only if the distance between two  $C\alpha$  atoms is less than 11 Å [50]. This means that  
89 proteins represented by these two models are coarse-grained at the residue level and as a result subtle changes in protein  
90 conformations cannot be captured.

91 Bond-to-bond propensity analysis was introduced recently to circumvent these limitations, mainly to retain atomistic  
92 detail and remain computationally efficient. It has been shown capable of predicting allosteric sites requiring only  
93 knowledge of orthosteric sites and ligands [53]. The method builds on the construction of an atomistic graph from a  
94 biomolecular structure with atoms described as nodes and bonds, whether covalent or noncovalent, as weighted edges.  
95 The resulting protein graph is analysed with an edge-to-edge transfer matrix  $M$  (Methods) and the effect of fluctuations  
96 of an edge on any other edge is calculated and represented by a propensity score. Therefore, this approach enables the  
97 measurement of long-range coupling between bonds which is crucial for allosteric signalling. This graph-theoretical  
98 model differs from all of the computational methods discussed above, except MD simulations, as it uses a fully atomistic  
99 representation of a protein which retains the physico-chemical details of a protein [54, 55]. Despite keeping the  
100 atomistic details of the protein structure, the method is computationally efficient: by employing advances in algorithmic  
101 matrix theory [56, 57], the computation time scales approximately linearly with respect to the number of edges,  
102 which makes the method applicable to large and multimeric proteins [58, 59] and high-throughput analysis in general.  
103 Furthermore, since there is no cutoff distance for interactions, both weak and long-range interactions within a protein can  
104 be captured by this model. Therefore, bond-to-bond propensity analysis presents a more cost-effective computational  
105 method to analyse proteins at the atomistic level and predict potential allosteric sites.

106 Bond-to-bond propensity analysis has successfully predicted 19 out of 20 allosteric sites for a test set of 20 proteins [53] and  
107 showcased the allostery in aspartate carbamoyltransferase (ATCase) and the main protease of the severe acute respiratory  
108 syndrome coronavirus 2 (SARS-CoV-2) [58, 60]. It has also been built into an efficient web application, ProteinLens,  
109 for the study of allostery [61]. To further benchmark this methodology and provide comparable insights into its  
110 performance across as diverse proteins as possible, we apply it here to two recently developed large, encompassing  
111 datasets, ASBench and CASBench. ASBench contains 235 allosteric sites [32] and computational methods such as  
112 AlloPred [48], AllositePro [49] and SBSMMA [51] have made use of this dataset for method validation. However, it  
113 is important to note that some of these methods use only the chain of the protein that contain orthosteric and allosteric  
114 sites. This means they may potentially miss communication between the sites if the pathway involves multiple chains or  
115 the entire protein structure as seen in multimeric proteins. We show in this work that bond-to-bond propensity analysis  
116 achieves overall higher accuracy in the ASBench dataset. We further tested bond-to-bond propensities with a more  
117 recent dataset, CASBench, which contains 91 protein entries with multiple crystal structures [33]. We evaluated the  
118 allosteric site prediction performance of our method in these datasets based on the four statistical measures used in  
119 [53] and two new measures introduced in this work.

## 120 2 Results

### 121 2.1 Bond-to-bond propensity analysis on the ASBench database

122 Proteins with annotated orthosteric residues, allosteric residues and ligands were collected from the ASBench and  
123 ASD databases as described in Methods and resulted in 118 structures of 113 distinct allosteric proteins. Bond-to-bond  
124 propensity analysis utilises the orthosteric ligand as the perturbation source to mimic the ligand-binding event [53] and  
125 identify regions on the protein which are functionally coupled to the orthosteric site. However, as orthosteric ligands are  
126 not available in structures from the ASBench database, the orthosteric site residues were selected as the source instead.  
127 For each protein, quantile scores, both intrinsic ( $p_{b, \text{allosteric site}}$ ,  $p_{R, \text{allosteric site}}$ ) and absolute ( $p_b^{\text{ref}}$ ,  $p_R^{\text{ref}}$ ), of all its bonds  
128 and residues were calculated with no *a priori* knowledge about the allosteric site (See Methods for more details). To  
129 assess the performance of the method and the significance of these calculated quantile scores, the allosteric site residues  
130 were used as the target point and evaluated with six statistical measures as described in Methods.

131 We here exemplify the method on bovine seminal ribonuclease (PDB ID: 11BG [62]), where we used the orthosteric  
132 site residues (Chain A: Asp14, Asn24, Asn27, Leu28, Asn94, Cys95, Chain B: Cys32 and Arg33) as the perturbation  
133 source. Figure 1 shows the propensity quantile score results mapped onto the protein structure where blue (0) indicates a  
134 low and red (1) a high connectivity to the active site. The values obtained from the statistical measures for the allosteric  
135 residues (allosteric ligand excluded if present) are summarised in Table 1.

136 Based on the criteria described, the experimentally identified allosteric site can be detected with all six statistical  
137 measures. This process was conducted for all 118 proteins obtained from ASBench under two conditions – with and  
138 without the allosteric ligand in the structure. The results are shown in Fig 2.

139 In the presence of the allosteric ligand, the allosteric site is detected for 106/118 structures, according to at least one  
140 statistical measure, and for 81/118 structures, according to at least three statistical measures. When the allosteric ligand  
141 is removed from the protein structure and the same analysis is applied, the allosteric site is detected for 99/118 structures,  
142 according to at least one statistical measure, and for 69/118 structures, according to at least three statistical measures.  
143 The slight decrease in success rate is probably owing to the interaction of the allosteric ligand with the allosteric site  
144 residues. Since these allosteric ligands are effective allosteric modulators of the corresponding protein, the binding of

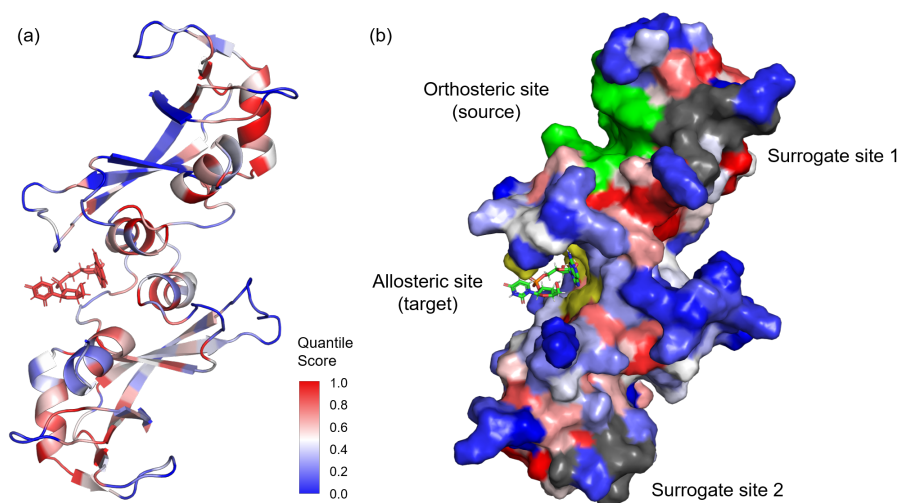

**Figure 1: Bond-to-bond propensity analysis on the atomistic graph of bovine seminal ribonuclease (PDB ID: 11BG) where the orthosteric residues (green) are used as the perturbation source. Note that:** (a) All residues are coloured by quantile score (QS) (see legend) obtained from bond-to-bond propensity analysis. (b) Surface representation of the protein structure coloured by QS. Relevant sites are highlighted and labelled accordingly.

**Table 1:** Results of bond-to-bond propensity analysis with six statistical measures for bovine seminal ribonuclease (11BG) (95% CI: 95% confidence interval)

| Statistical Measures                            | Results                                  | Allosteric Site Detection |
|-------------------------------------------------|------------------------------------------|---------------------------|
| $\overline{p_b}$ , allosteric site<br>95% CI    | 0.529 (> 0.495)<br>0.487, [0.478, 0.495] | Success                   |
| $\overline{p_R}$ , allosteric site<br>95% CI    | 0.665 (> 0.528)<br>0.525, [0.522, 0.528] | Success                   |
| $P(p_b, \text{allosteric site} > 0.95)$         | 0.081 (> 0.05)                           | Success                   |
| $P(p_R, \text{allosteric site} > 0.95)$         | 0.125 (> 0.05)                           | Success                   |
| $\overline{p_b^{\text{ref}}}$ , allosteric site | 0.508 (> 0.5)                            | Success                   |
| $\overline{p_R^{\text{ref}}}$ , allosteric site | 0.780 (> 0.5)                            | Success                   |

145 the allosteric ligand would strengthen the functional coupling of the allosteric site to the orthosteric site which can be  
 146 highlighted by the method. The average residue QS of the allosteric site for 109/118 structures decreases when the  
 147 allosteric ligand is not present and those for the other nine structures only increased by less than 0.01 suggesting the  
 148 same conclusion. Despite a lower success rate without the allosteric ligand, allosteric sites of 84% of the structures can  
 149 be identified with only the knowledge of orthosteric site residues.

## 150 2.2 Prediction accuracy of bond-to-bond propensity analysis on the ASBench database

151 We focus here on the 12 structures with allosteric ligands where the allosteric site could not be detected by any of the  
 152 measures. From those 12, the orthosteric residues of three structures (PDB IDs: 1UXV, 2VD3 and 3QH0) reported  
 153 in the ASD database are incorrect (that is they do not form a binding site) and those of one further structure (PDB  
 154 ID: 2ATS) do not match with the data in ASBench. From the remaining eight, six structures (PDB IDs: 1M8P, 3D2P,  
 155 3DC2, 3HQP, 3R1R and 4HYW) obtained from the ASBench are only one part of a large and complex multimeric  
 156 protein, where the effect of cooperativity might play a crucial role. For example, it has been demonstrated with  
 157 aspartate camoyltransferase (ATCase), a large dodecameric protein with six orthosteric sites, that only when at least  
 158 three orthosteric sites are involved, allosteric behaviour is detected [58]. Since only one orthosteric site is reported

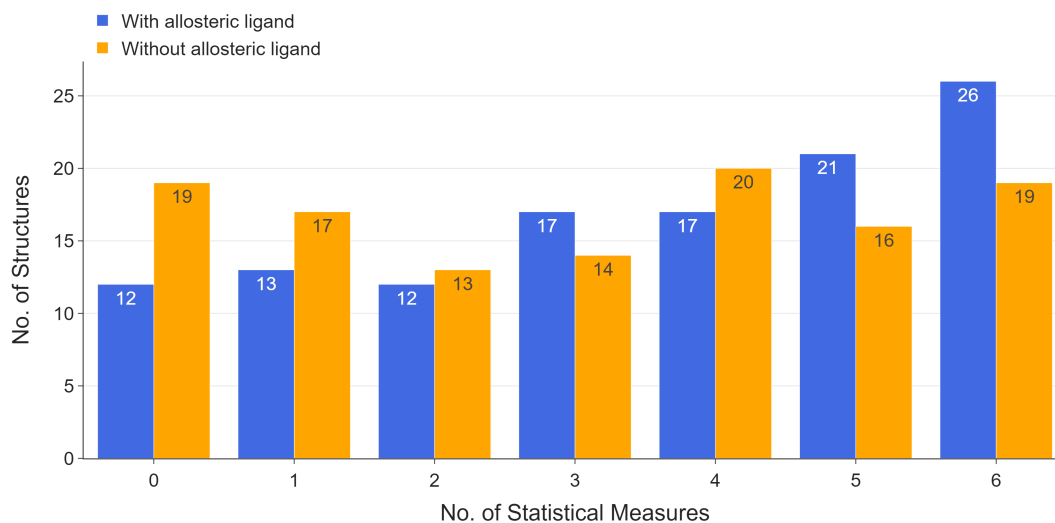

**Figure 2: Allosteric site detection results for 118 structures in the ASBench database.** The x-axis indicates the number of statistical measures for successful allosteric site detection.

159 in ASBench for these structures, this could explain the failure of identification of allosteric sites in these proteins  
160 when using only one orthosteric site as the perturbation source. From the remaining two structures, the G336V mutant  
161 of E.coli phosphoglycerate dehydrogenase (PDB ID: 2PA3) displays a different allosteric mechanism – the flip flop  
162 mechanism [63], which involves large scale mechanical changes. Lastly, the human muscle glycogen phosphorylase  
163 (PDB ID: 1Z8D) contains two allosteric sites [64] with only allosteric site 1 being detected, highlighted in red in Fig 3.  
164 This is due to the other site (highlighted in blue) being in close proximity to the orthosteric site where direct interactions,  
165 instead of long-range coupling, occur between the two sites.

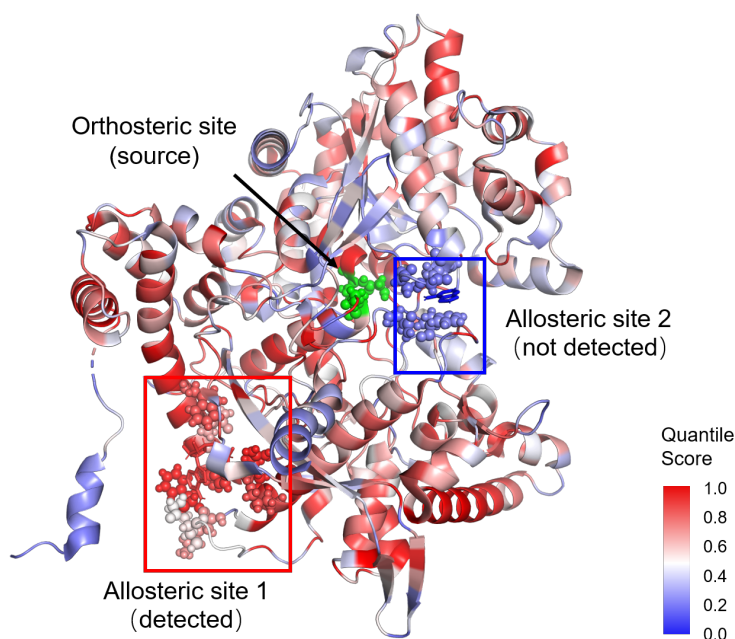

**Figure 3: Structure of human muscle glycogen phosphorylase (PDB ID: 1Z8D [64]).** The orthosteric (green) and two allosteric (circled in blue and red) site residues are highlighted as spheres

166 Upon removing the allosteric ligands, allosteric sites of seven more structures could not be identified. For the structure  
 167 of UDP-glucose dehydrogenase (PDB ID: 3PJG), ASBench has incorrect orthosteric residues reported (not forming a  
 168 binding pocket) and hence, a wrong perturbation source was used. Haemoglobin (PDB ID: 1B86) is a well-known  
 169 protein with cooperativity underpinning its activity [65] and contains four orthosteric sites. As only one orthosteric  
 170 site is reported in ASBench, the coupling of the allosteric site to this one site could not be detected as it might not be  
 171 strong enough. Two structures (PDB IDs: 3C1N and 3H6O) are large and complex multimeric proteins where again  
 172 cooperativity would affect the results. The orthosteric sites and allosteric sites of the other three structures (PDB IDs:  
 173 2W4I, 3MWB, 4B1F), similar to those of 1Z8D above, are in close proximity. The allosteric effect is not mediated by  
 174 long-range coupling and is thus not revealed by propensity analysis.

175 It is worth noting that the allosteric sites are generally large in size based on the definition provided in the ASBench  
 176 database (residues within 6 Å from the allosteric ligand). In the previous bovine seminal ribonuclease (PDB ID: 11BG)  
 177 example, the allosteric site contains eight residues but only four residues form direct interactions with the allosteric  
 178 ligand. Defining the allosteric site using these four residues, which is essentially a sub-site of the original allosteric site,  
 179 and rerunning all calculations give slightly different results as shown in Table 2.

**Table 2:** Results of bond-to-bond propensity analysis with six statistical measures for bovine seminal ribonuclease (PDB ID: 11BG) (95% CI: 95% confidence interval)

| Statistical Measures                                    | Results (8 Allosteric Residues)          | Results (4 Allosteric Residues)          |
|---------------------------------------------------------|------------------------------------------|------------------------------------------|
| $\overline{p_{b, \text{allosteric site}}}$<br>95% CI    | 0.529 (> 0.495)<br>0.487, [0.478, 0.495] | 0.529 (> 0.494)<br>0.484, [0.475, 0.495] |
| $\overline{p_{R, \text{allosteric site}}}$<br>95% CI    | 0.665 (> 0.528)<br>0.525, [0.522, 0.528] | 0.659 (> 0.501)<br>0.498, [0.494, 0.501] |
| $P(p_{b, \text{allosteric site}} > 0.95)$               | 0.081 (> 0.05)                           | 0.106 (> 0.05)                           |
| $P(p_{R, \text{allosteric site}} > 0.95)$               | 0.125 (> 0.05)                           | 0.25 (> 0.05)                            |
| $\overline{p_{b, \text{allosteric site}}^{\text{ref}}}$ | 0.508 (> 0.5)                            | 0.510 (> 0.5)                            |
| $\overline{p_{R, \text{allosteric site}}^{\text{ref}}}$ | 0.780 (> 0.5)                            | 0.808 (> 0.5)                            |

180  $\overline{p_{b, \text{allosteric site}}}$  does not change while  $\overline{p_{R, \text{allosteric site}}}$  decreases slightly when only four allosteric residues were scored,  
 181 however, comparisons with  $\langle p_{b, \text{site}} \rangle_{\text{surrogate sites}}$  and  $\langle p_{R, \text{site}} \rangle_{\text{surrogate sites}}$  calculated from the 1,000 surrogate sites indi-  
 182 cates that the allosteric site is more significant compared with other surrogate sites. The increase of values for the other  
 183 four measures complements this argument. Therefore, defining the allosteric site with the four interacting residues leads  
 184 to better detection of the allosteric site and one needs to take note that actual results may be buried by the definition of a  
 185 large allosteric site. Hence, it is important to characterise the allosteric site and include relevant residues properly which  
 186 presents an ongoing problem [66].

187 Similarly, not all residues in the orthosteric site defined in the database interact with the orthosteric ligand or support its  
 188 binding. Due to the absence of orthosteric ligands in the structures from the ASBench database, comparisons between  
 189 using the orthosteric site residues and the orthosteric ligand as perturbation source cannot be achieved.

### 190 2.3 Bond-to-bond propensity analysis on the CASBench database

191 314 structures of 33 allosteric proteins with orthosteric ligands and description of orthosteric and allosteric residues  
 192 were collected from the CASBench database. As seen in the ASBench data analysis above, the presence of the allosteric  
 193 ligand strengthens the coupling to the orthosteric site and makes the result biased towards successful detection of the  
 194 allosteric site. Hence, the allosteric ligand (if present in the structure) is removed when carrying out bond-to-bond  
 195 propensity analysis for the CASBench database.

196 Bond-to-bond propensity analysis was conducted for these 314 structures using the orthosteric ligand or orthosteric site  
 197 residues (with orthosteric ligand removed) as the perturbation source in two separate runs. When multiple orthosteric  
 198 ligands or sites are present, all of them were used as the source. Moreover, when there are multiple allosteric sites in the  
 199 protein structure, each of them is investigated separately with the six statistical measures and the average value for each  
 200 of the measures is used to decide whether the allosteric sites can be detected for the protein. Taking *Escherichia coli*

201 biotin repressor (PDB ID: 2EWN [67]) as an example, which has two allosteric sites, the results are summarised in  
 202 Table 3.

**Table 3:** Results of bond-to-bond propensity analysis with six statistical measures and averaging for *Escherichia coli* biotin repressor (PDB ID: 2EWN) (95% CI: 95% confidence interval). The two allosteric sites were scored separately based on the six metrics separately and the averaged scored was used to assess whether the allosteric sites of *Escherichia coli* biotin repressor can be detected by each measure.

| Statistical Measures                            | Results                                                                                              | Average                                  | Allosteric Site Detection |
|-------------------------------------------------|------------------------------------------------------------------------------------------------------|------------------------------------------|---------------------------|
| $\overline{p_b}$ , allosteric site<br>95% CI    | Site 1: 0.333 (< 0.523)<br>0.516, [0.510, 0.523]<br>Site 2: 0.326 (< 0.528)<br>0.521, [0.515, 0.528] | 0.329 (< 0.523)<br>0.516, [0.510, 0.523] | Failure                   |
| $\overline{p_R}$ , allosteric site<br>95% CI    | Site 1: 0.532 (> 0.509)<br>0.506, [0.504, 0.509]<br>Site 2: 0.500 (< 0.510)<br>0.507, [0.504, 0.510] | 0.516 (< 0.523)<br>0.516, [0.510, 0.523] | Failure                   |
| $P(p_b, \text{allosteric site} > 0.95)$         | Site 1: 0.013 (< 0.05)<br>Site 2: 0 (< 0.05)                                                         | 0.007 (< 0.05)                           | Failure                   |
| $P(p_R, \text{allosteric site} > 0.95)$         | Site 1: 0 (< 0.05)<br>Site 2: 0 (< 0.05)                                                             | 0 (< 0.05)                               | Failure                   |
| $\overline{p_b^{\text{ref}}}$ , allosteric site | Site 1: 0.438 (< 0.5)<br>Site 2: 0.444 (< 0.5)                                                       | 0.441 (< 0.5)                            | Failure                   |
| $\overline{p_R^{\text{ref}}}$ , allosteric site | Site 1: 0.686 (> 0.5)<br>Site 2: 0.668 (> 0.5)                                                       | 0.677 (> 0.5)                            | Success                   |

203 It is observed in some cases that some of the allosteric sites of the protein can be detected by a particular measure while  
 204 the other sites cannot be detected ( $\overline{p_R}$ , allosteric site in this case). Therefore, the criteria used here are stringent and would  
 205 be effective and meaningful in assessing the performance of bond-to-bond propensity analysis and the performance  
 206 summary is shown in Fig 4.  
 207

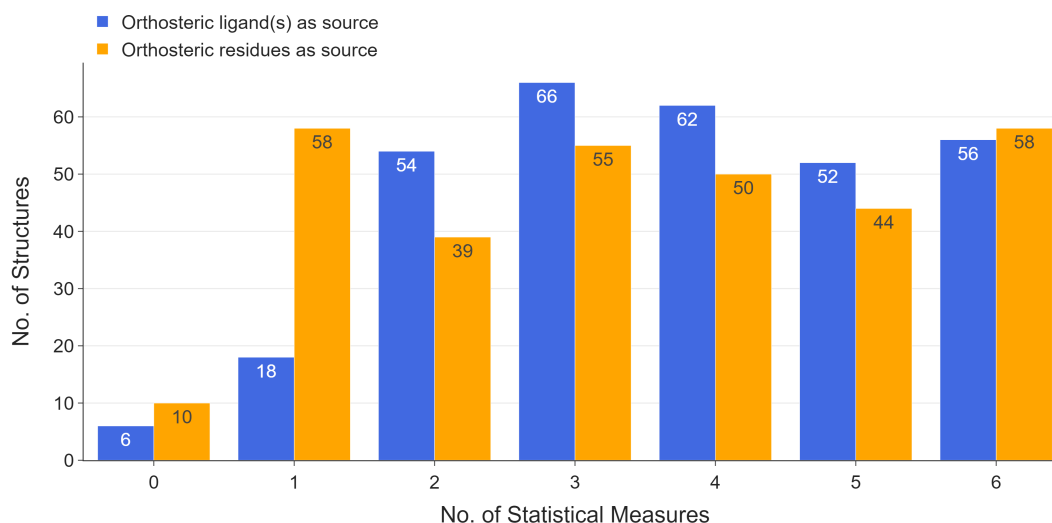

**Figure 4: Allosteric site detection results for 314 structures in the CASBench database.** The x-axis indicates the number of statistical measures for successful allosteric site detection.

208 When the orthosteric ligand is selected as the perturbation source, the allosteric site is detected for 308/314 structures  
 209 (32/33 proteins), according to at least one statistical measure. When using the orthosteric site residues as the source,  
 210 the allosteric site is detected for 304/314 structures (32/33 proteins), according to at least one statistical measure. It is

211 observed that, in general, the allosteric site of a protein structure can be identified with more statistical measures when  
212 the orthosteric ligand is set as the perturbation source.

213 If the orthosteric ligand is selected as the source, the source bonds include the weak bonds formed by the ligand and the  
214 surrounding residues. The orthosteric site includes all residues within 5 Å of the orthosteric ligand [33]. Therefore, the  
215 number of source bonds is much lower compared to when using the entire orthosteric site residues as the source. The  
216 different and better results obtained by using the ligand as the source suggest that the allosteric site is closely coupled  
217 to the ligand-binding event at the orthosteric site. Although successful allosteric site detection is achieved by fewer  
218 statistical measures using the whole orthosteric site as the source, the method still succeeds in identifying allosteric sites  
219 for more than 96% of the 314 structures. Combined with the results from analysing the ASBench database, for which  
220 orthosteric residues are used as the source, the results indicate that propensity analysis reveals the intrinsic coupling of  
221 the allosteric site to the region where the orthosteric binding occurs. Using the orthosteric ligand as the perturbation  
222 source allows a more accurate detection of allosteric sites. However, if there is no structure containing the orthosteric  
223 ligand, the approximate site containing orthosteric residues would still be a good choice to uncover distant sites coupled  
224 to the region and provide guidance on allosteric site detection.

## 225 2.4 Prediction accuracy of bond-to-bond propensity analysis on the CASBench database

226 We focus here on the six structures for which the allosteric site cannot be detected by any of the measures when using  
227 orthosteric ligands as the source. One of them (PDB ID: 4R1R) is ribonucleotide reductase protein R1 (CAS0047). It is  
228 a large and complex multimeric protein and only one orthosteric site is reported in the CASBench database. Hence,  
229 the effect of cooperativity could affect the performance of propensity analysis as previously discussed. Another two  
230 structures (PDB IDs: 1FUQ, 1KQ7) are two out of the four structures of fumarase (CAS0085). This is also a complex  
231 multimeric protein where bond-to-bond propensity analysis may not perform well if not all orthosteric ligands are  
232 present. The remaining three structures are epoxide hydrolase (CAS0002) (PDB IDs: 5AIA, 5ALN and 5ALT). We  
233 analysed 28 structures of epoxide hydrolase in total, each with a different orthosteric ligand. Hence, different ligands,  
234 even when binding at the same orthosteric site, exert different perturbation effects on the protein.

235 When orthosteric residues were used as the perturbation source, the allosteric sites of two structures (PDB IDs: 1LLD,  
236 1LTH) of L-lactate dehydrogenase (CAS0028) were not identified. This can be partly explained by the changed  
237 perturbation effects as the allosteric sites were identified when sourcing from the orthosteric ligands. In CASBench, the  
238 orthosteric sites include residues within 5 Å from the orthosteric ligands which leads to a large region as the perturbation  
239 source. This shows that the specific ligand-site interactions are crucial for accurate allosteric site detection. This is  
240 consistent with the overall trend since it has been shown above that successful allosteric site detection is achieved by  
241 more statistical measures using the orthosteric ligand as the source. Moreover, allosteric sites of another eight structures  
242 were not detected when only using the orthosteric site residues as the source. This further strengthens the idea that the  
243 method is sensitive to specific interactions between the ligand and the protein and holds the potential to evaluate the  
244 performance of different ligands in the orthosteric site.

## 245 3 Discussion

246 Allosteric sites are of great interest in understanding biological function as well as in drug targeting, but, are difficult  
247 to predict and in general poorly understood. They are usually discovered serendipitously and require experimental  
248 verification. Two recently introduced allosteric protein databases, ASBench [32] and CASBench [33], aim to collect  
249 available information on known allosteric sites and are hence excellent benchmarking tools for promising computational  
250 approaches. To test the capability of bond-to-bond propensity analysis, a recently developed method that was shown  
251 to be able to predict allosteric sites, we deployed the method to both databases, which, after cleaning, provided 432  
252 protein structures for analysis.

253 An important part of this process is the scoring of the target sites. In addition to previously used scoring measures, we  
254 introduced two additional statistical measures, namely the average reference residue quantile score of the allosteric  
255 residues,  $\overline{p_{R, \text{allosteric site}}^{\text{ref}}}$  and the proportion of allosteric residues with QS above 0.95,  $P(p_{R, \text{allosteric site}} > 0.95)$ . The first  
256 measures the absolute propensities of residues in the allosteric site compared to the SCOP reference set and the second  
257 counts the number of high scoring residues in the allosteric site. These two measures complement the existing four  
258 metrics and enable thorough analysis of the significance of the quantile scores computed from bond-to-bond propensity  
259 analysis.

260 Benchmarking datasets of allosteric proteins, namely the ASBench and the CASBench databases, were used for analysis.  
261 For structures in ASBench, the orthosteric residues were used as the perturbation source. With the presence of the  
262 allosteric ligand, the allosteric site is identified for 106/118 (89.8%) structures and the allosteric site is detected for



263 99/118 (83.9%) structures when the allosteric ligand is removed, according to at least one statistical measure. Despite  
264 the strengthening of functional coupling of the allosteric site to the orthosteric site by the allosteric ligand, propensity  
265 analysis is still able to reveal the intrinsic connectivity between the two sites. For the CASBench database we conducted  
266 our analysis sourced from the orthosteric ligands or the orthosteric residues and managed to detect the allosteric  
267 sites according to at least one statistical measure for 308/314 (98.1%) structures (32/33 proteins) and for 304/314  
268 (96.8%) structures (32/33 proteins), respectively. The allosteric site of a protein structure can be identified with more  
269 statistical measures when choosing the orthosteric ligand as the source. This observation suggests that using the ligand  
270 as the source confers the perturbation effect of the binding event more accurately. However, if the information on the  
271 orthosteric substrate is not available, it is viable to select the orthosteric residues as the perturbation source.

272 The results presented here strengthen confidence in allosteric site identification as predicted by bond-to-bond propensity,  
273 which coupled with the efficiency of the method make it an attractive approach. Generally, the definition of orthosteric  
274 and allosteric residues, which would significantly affect the size and residues involved, plays an essential part when  
275 evaluating allosteric site prediction methods and was also highlighted for bond-to-bond propensity analysis. Finally,  
276 more detailed analysis would be usually required in cases where the allosteric site and the orthosteric site are in very  
277 close proximity, to elucidate the effect of cooperativity in large and complex multimeric proteins or the role of structural  
278 water molecules, which could still be possible given the computational efficiency of the approach.

## 279 4 Methods

### 280 4.1 Allosteric protein datasets

281 **The ASBench database** 235 X-ray crystal structures of allosteric proteins were downloaded from the ASBench  
282 database. Experimentally determined orthosteric and allosteric site residues for these proteins were attained from ASD  
283 Release 4.1079. The data was further processed to exclude entries without orthosteric site information or incomplete  
284 structures. The resulting 118 structures were all analysed by bond-to-bond propensity. Details can be found in  
285 Supplementary Information Table S2. Note that results on the first 4 of the 6 scoring measures were first reported in the  
286 supplementary information of reference [61] without any analysis.

287 **The CASBench database** X-ray crystal structures containing various orthosteric and allosteric ligands of 91 allosteric  
288 proteins in PDB format were downloaded from the CASBench website together with the corresponding experimentally  
289 determined orthosteric and allosteric site residues. This data was further processed to exclude incomplete structures  
290 and the resulting 314 structures of 33 distinct proteins were used for bond-to-bond propensity analysis. The proteins  
291 in CASBench are labelled with CAS ID and the list of proteins with corresponding CAS ID used in this work can be  
292 found in Supplementary Information Table S5.

### 293 4.2 Construction of the atomistic protein graph

294 Bond-to-bond propensity analysis starts by constructing a weighted atomistic graph using the 3-dimensional coordinates  
295 of the atoms of the protein in the PDB files. Atoms are represented by nodes and bond and interactions that link the  
296 atoms are represented by edges. The weights of edges correspond to the interaction energies between the atoms with  
297 weights derived from relevant interatomic potentials. An in-depth procedure for the atomistic protein graph construction  
298 has been described in refs [54, 55]. In this work, Biochemical, atomistic graph construction software in Python for  
299 proteins, etc. (BagPype) [68, 61] was used to construct the atomistic protein graph and Fig. 5 illustrates the main  
300 features of this process using bovine seminal ribonuclease (11BG) as an example. The crystal structures in the PDB files  
301 are cleaned accordingly and hydrogen atoms are added using Reduce (v.3.23) [69], which is incorporated in BagPype.  
302 Covalent bonds are weighted using standard bond energies [70]. The weighting of  $\pi - \pi$  stacking, hydrophobic  
303 interaction, hydrogen bonding and electrostatic interactions is done based on potentials in references [71, 72, 73],  
304 respectively. The weighted graph is then converted to an  $N \times N$  adjacency matrix, where  $N$  is the number of nodes  
305 (atoms).

### 306 4.3 Bond-to-bond propensities

Bond-to-bond Propensity was first introduced in Ref. [53] and further discussed in Ref. [58], hence it is only briefly  
summarised here. The edge-to-edge transfer matrix  $M$  was introduced to study non-local edge-coupling in graphs [74]  
and an alternative interpretation of  $M$  is employed to analyse the atomistic protein graph. The element  $M_{ij}$  describes  
the effect that a perturbation at edge  $i$  has on edge  $j$ .  $M$  is given by

$$M = \frac{1}{2}WB^T L^\dagger B \quad (1)$$

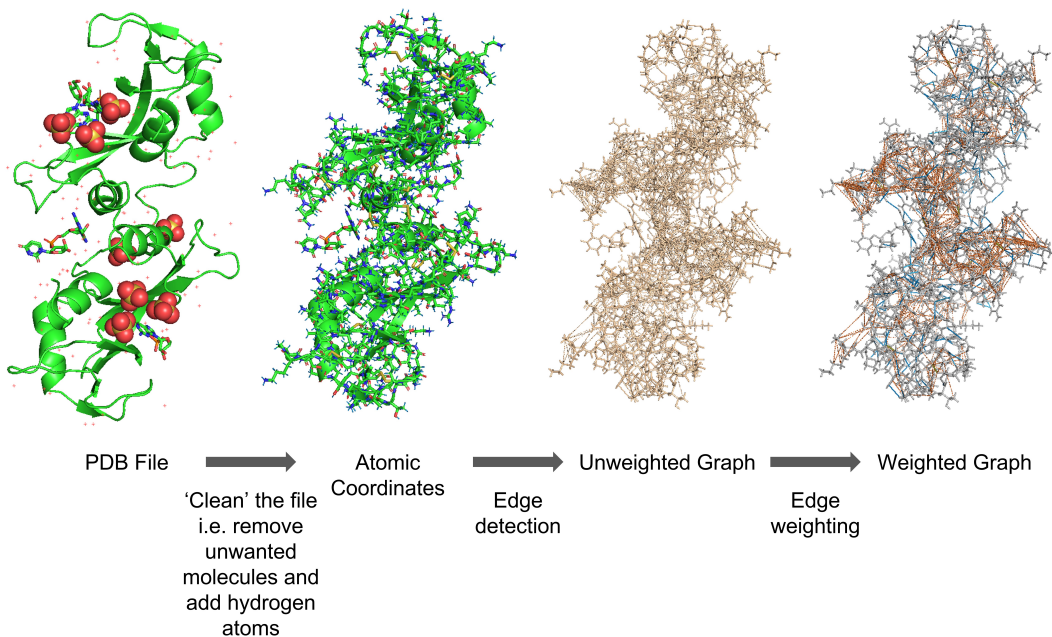

**Figure 5: Atomistic graph construction.** Main steps of the atomistic protein graph construction package, BagPype, using the structure of bovine seminal ribonuclease (PDB ID: 11BG [62]) as an example.

where  $B$  is the  $n \times m$  incidence matrix for the atomistic protein graph with  $n$  nodes and  $m$  edges;  $W = \text{diag}(w_{ij})$  is an  $m \times m$  diagonal matrix which possesses all edge interaction energies with  $w_{ij}$  as the weight of the edge connecting nodes  $i$  and  $j$ , i.e. the bond energy between the atoms.  $L^\dagger$  is the pseudo-inverse of the weighted graph Laplacian matrix  $L$  [75].  $L$ , which defines the diffusion dynamics on the energy-weighted graph [76] and is defined as:

$$L_{ij} = \begin{cases} -w_{ij}, & i \neq j \\ \sum_j w_{ij}, & i = j \end{cases} \quad (2)$$

To evaluate the effect of perturbations from a group of bonds  $b'$ , which belong to the orthosteric ligand or the orthosteric site residues (i.e., the source), on a bond  $b$  anywhere else in the protein, we calculate:

$$\prod_b^{raw} = \sum_{b' \in source} |M_{bb'}| \quad (3)$$

This is the raw propensity of an individual bond which reflects how strongly the bond is coupled to the source. As different proteins contain different numbers of bonds, the raw propensity is normalised and the bond propensity is defined as:

$$\prod_b = \frac{\prod_b^{raw}}{\sum_b \prod_b^{raw}} \quad (4)$$

The residue propensity is then defined as the sum of normalised bond propensities of all the bonds of a residue,  $R$ :

$$\prod_R = \sum_{b \in R} \prod_b \quad (5)$$

#### 307 4.4 Quantile regression

Bond and residue propensities naturally decrease as the distance of the bond or residue from the perturbation source increases. To determine the bonds and residues that are significant, bond and residue propensities at a similar distance

from the source are compared using conditional quantile regression (QR) [77]. The distance of a bond  $b$  from the perturbation source is defined as the minimum distance,  $d_b$ , between  $b$  and any bond of the source:

$$d_b = \min_{b' \in \text{source}} |\mathbf{x}_b - \mathbf{x}_{b'}|, \quad (6)$$

where the vector  $\mathbf{x}_b$  contains the cartesian coordinates of the midpoint of bond  $b$ . As propensity  $\prod_b$  decays exponentially with distance  $d$ , a linear model for the logarithm of the propensities is adopted to solve the QR minimisation problem:

$$\hat{\beta}_b^{\text{protein}}(p) = \arg \min_{(\beta_{b,0}, \beta_{b,1})} \sum_b^{\text{protein}} \rho_p(\log(\prod_b) - (\beta_{b,0} + \beta_{b,1}d_b)), \quad (7)$$

where  $\rho_p(\cdot)$  is the tilted absolute value function:

$$\rho_p(y) = |y(p - \mathbb{1}(y < 0))| \quad (8)$$

$p$  is the quantile and  $\mathbb{1}(\cdot)$  is the indicator function. The optimised model  $\hat{\beta}^{\text{protein}} = (\hat{\beta}_{b,0}^{\text{protein}}(p), \hat{\beta}_{b,1}^{\text{protein}}(p))$  describes the sum of the quantiles of the propensities for all bonds in the protein. The bond quantile score of bond  $b$  with propensity  $\prod_b$  at distance  $d_b$  from the source can be calculate by finding the quantile  $p_b$  such that:

$$p_b = \arg \min_{p \in [0,1]} \left| \log(\prod_b) - (\hat{\beta}_{b,0}^{\text{protein}}(p) + \hat{\beta}_{b,1}^{\text{protein}}(p)d_b) \right| \quad (9)$$

The residue quantile score of residue  $R$  is defined similarly by using the residue propensity as shown in eq. 5 and the distance  $d_p$  which is the minimum distance between the atoms of a residue and those of the source. Therefore,

$$\hat{\beta}_R^{\text{protein}}(p) = \arg \min_{(\beta_{R,0}, \beta_{R,1})} \sum_R^{\text{protein}} \rho_p(\log(\prod_R) - (\beta_{R,0} + \beta_{R,1}d_R)), \quad (10)$$

and

$$p_R = \arg \min_{p \in [0,1]} \left| \log(\prod_R) - (\hat{\beta}_{R,0}^{\text{protein}}(R) + \hat{\beta}_{R,1}^{\text{protein}}(p)d_R) \right| \quad (11)$$

308 are used to calculate the residue quantile score.

#### 309 4.5 Statistical evaluation of allosteric bond and residue quantile scores (QS)

310 Four statistical measures have been used to evaluate the significance of the quantile scores (QS) by Amor *et al.* [53] and  
311 were employed in this project as listed below:

##### 312 1. The average bond quantile score of the allosteric site:

$$\overline{p_b, \text{allosteric site}} = \frac{\sum_{b \in \text{allosteric site}} p_b}{N_b, \text{allosteric site}} \quad (12)$$

313 where  $N_b$ , allosteric site is the number of bonds in the allosteric site.

##### 314 2. The average residue quantile score of the allosteric site:

$$\overline{p_R, \text{allosteric site}} = \frac{\sum_{R \in \text{allosteric site}} p_R}{N_R, \text{allosteric site}} \quad (13)$$

315 where  $N_R$ , allosteric site is the number of residues in the allosteric site.

##### 316 3. The proportion of bonds in the allosteric site with bond quantile score greater than 0.95

317 i.e.  $P(p_b, \text{allosteric site} > 0.95)$ .

318 **4. The average reference bond quantile score of the allosteric site:**

$$\overline{p_{b, \text{allosteric site}}^{\text{ref}}} = \frac{\sum_{b \in \text{allosteric site}}^{\text{ref}} p_b^{\text{ref}}}{N_{b, \text{allosteric site}}} \quad (14)$$

319 where  $N_{b, \text{allosteric site}}$  is the number of bonds in the allosteric site.

320 For the purpose of complementing these previous measures and to investigate more aspects of allosteric site detection,  
321 two additional measures were introduced in this work:

322 **5. The proportion of residues in the allosteric site with residue quantile score greater than 0.95**

323 i.e.  $P(p_{R, \text{allosteric site}} > 0.95)$ .

324 **6. The average reference residue quantile score of the allosteric site:**

$$\overline{p_{R, \text{allosteric site}}^{\text{ref}}} = \frac{\sum_{R \in \text{allosteric site}}^{\text{ref}} p_R^{\text{ref}}}{N_{R, \text{allosteric site}}} \quad (15)$$

325 where  $N_{R, \text{allosteric site}}$  is the number of residues in the allosteric site.

326 To assess the significance of the average bond and residue quantile score  $\overline{p_{b, \text{allosteric site}}}$  and  $\overline{p_{R, \text{allosteric site}}}$ , structural  
327 bootstrap is used to sample random surrogate sites from the same protein. These surrogate sites need to follow  
328 two structural rules: (1) the number of residues is equal to the number of residues in the allosteric site and (2) the  
329 diameter (maximum distance between any two atoms in the site) is smaller than that of the allosteric site. For each  
330 protein, 1,000 surrogate sites are generated and the average bond and residue quantile scores  $\langle \overline{p_{b, \text{site}}} \rangle_{\text{surrogate sites}}$   
331 and  $\langle \overline{p_{R, \text{site}}} \rangle_{\text{surrogate sites}}$  of these sites are calculated. The scores are compared with those of the allosteric sites  
332 ( $\overline{p_{b, \text{allosteric site}}}$  and  $\overline{p_{R, \text{allosteric site}}}$ ). A 95% confidence interval is obtained for each protein to assess the statistical  
333 significance by using bootstrap with 10,000 resamples with replacement [78]. Fig 1 illustrates the process using 11BG  
334 as an example. If the average quantile score, whether bond or residue of the allosteric residues, is above the upper  
335 bound of the 95% confidence interval, the allosteric site is assumed to be detected according to the corresponding  
336 statistical measure. The proportion of both bonds and residues of the allosteric residues with a quantile score above  
337 0.95 ( $P(p_{b, \text{allosteric site}} > 0.95)$  and  $P(p_{R, \text{allosteric site}} > 0.95)$ ) is then calculated. If the proportion exceeds the expected  
338 proportion of 0.05, the allosteric site is classified as identified. Lastly, the average reference bond and residue quantile  
339 scores of the allosteric residues ( $\overline{p_{b, \text{site}}^{\text{ref}}}$  and  $\overline{p_{R, \text{site}}^{\text{ref}}}$ ) are computed and a value above 0.5 (the expected value) suggests  
340 that the allosteric site is uncovered.

341 **Data availability**

342 All data presented in this study are available upon request.

343 **Acknowledgements**

344 We acknowledge helpful discussions with Florian Song, Ching Ching Lam and Jerzy Pilipczuk. This work was funded  
345 by the President's PhD Scholarships to N.W.. L.S. acknowledges funding from a Wellcome Trust studentship [grant  
346 number 215360/Z/19/Z]. N.W. and S.N.Y. acknowledge funding from the EPSRC award EP/N014529/1 supporting the  
347 EPSRC Centre for Mathematics of Precision Healthcare.

348 **Author contributions**

349 N.W., L.S. and S.N.Y. conceived the study. N.W. performed the computations and created the figures and all authors  
350 analysed the data and wrote the manuscript.

351 **Competing interests**

352 The authors declare no competing interests.

## 353 **Materials & Correspondence**

354 All requests for data and code shall be directed to [s.yaliraki@imperial.ac.uk](mailto:s.yaliraki@imperial.ac.uk).

## 355 **References**

- 356 [1] Casem, M. L. Chapter 3 - Proteins. In *Case studies in cell biology*, 23–71 (Academic Press, Amsterdam, 2016).
- 357 [2] Gonzalez, M. W. & Kann, M. G. Chapter 4: Protein Interactions and Disease. *PLOS Computational Biology* **8**,  
358 e1002819 (2012). URL <https://doi.org/10.1371/journal.pcbi.1002819>.
- 359 [3] Santos, R. *et al.* A comprehensive map of molecular drug targets. *Nature reviews. Drug discovery* **16**, 19–  
360 34 (2017). URL <https://pubmed.ncbi.nlm.nih.gov/27910877>[https://www.ncbi.nlm.nih.gov/pmc/](https://www.ncbi.nlm.nih.gov/pmc/articles/PMC6314433/)  
361 [articles/PMC6314433/](https://www.ncbi.nlm.nih.gov/pmc/articles/PMC6314433/).
- 362 [4] Abdel-Magid, A. F. Allosteric modulators: an emerging concept in drug discovery. *ACS medicinal chemistry*  
363 *letters* **6**, 104–107 (2015). URL <https://pubmed.ncbi.nlm.nih.gov/25699154>[https://www.ncbi.nlm.](https://www.ncbi.nlm.nih.gov/pmc/articles/PMC4329591/)  
364 [nih.gov/pmc/articles/PMC4329591/](https://www.ncbi.nlm.nih.gov/pmc/articles/PMC4329591/).
- 365 [5] Grover, A. K. Use of Allosteric Targets in the Discovery of Safer Drugs. *Medical Principles and Practice* **22**,  
366 418–426 (2013). URL <https://www.karger.com/DOI/10.1159/000350417>.
- 367 [6] Traxler, P. & Furet, P. Strategies toward the Design of Novel and Selective Protein Tyrosine Kinase Inhibitors. *Phar-*  
368 *macology & Therapeutics* **82**, 195–206 (1999). URL [http://www.sciencedirect.com/science/article/](http://www.sciencedirect.com/science/article/pii/S0163725898000448)  
369 [pii/S0163725898000448](http://www.sciencedirect.com/science/article/pii/S0163725898000448).
- 370 [7] Munita, J. M. & Arias, C. A. Mechanisms of Antibiotic Resistance. *Microbiology spectrum* **4**, 0016–  
371 2015 (2016). URL <https://pubmed.ncbi.nlm.nih.gov/27227291>[https://www.ncbi.nlm.nih.gov/](https://www.ncbi.nlm.nih.gov/pmc/articles/PMC4888801/)  
372 [pmc/articles/PMC4888801/](https://www.ncbi.nlm.nih.gov/pmc/articles/PMC4888801/).
- 373 [8] Li, W. *et al.* Mechanism of tetracycline resistance by ribosomal protection protein Tet(O). *Nature communications*  
374 **4**, 1477 (2013). URL <https://pubmed.ncbi.nlm.nih.gov/23403578>[https://www.ncbi.nlm.nih.gov/](https://www.ncbi.nlm.nih.gov/pmc/articles/PMC3576927/)  
375 [pmc/articles/PMC3576927/](https://www.ncbi.nlm.nih.gov/pmc/articles/PMC3576927/).
- 376 [9] Dönhöfer, A. *et al.* Structural basis for TetM-mediated tetracycline resistance. *Proceedings of the National*  
377 *Academy of Sciences of the United States of America* **109**, 16900–16905 (2012). URL [https://pubmed.ncbi.](https://pubmed.ncbi.nlm.nih.gov/23027944)  
378 [nlm.nih.gov/23027944](https://pubmed.ncbi.nlm.nih.gov/23027944)<https://www.ncbi.nlm.nih.gov/pmc/articles/PMC3479509/>.
- 379 [10] Hooper, D. C. Fluoroquinolone resistance among Gram-positive cocci. *The Lancet Infectious Diseases* **2**, 530–538  
380 (2002). URL <http://www.sciencedirect.com/science/article/pii/S1473309902003699>.
- 381 [11] Leclercq, R. Mechanisms of Resistance to Macrolides and Lincosamides: Nature of the Resistance Elements  
382 and Their Clinical Implications. *Clinical Infectious Diseases* **34**, 482–492 (2002). URL [https://doi.org/10.](https://doi.org/10.1086/324626)  
383 [1086/324626](https://doi.org/10.1086/324626).
- 384 [12] Hiramatsu, K. *et al.* Genomic Basis for Methicillin Resistance in Staphylococcus aureus. *Infection & chemotherapy*  
385 **45**, 117–136 (2013). URL <https://pubmed.ncbi.nlm.nih.gov/24265961>[https://www.ncbi.nlm.nih.](https://www.ncbi.nlm.nih.gov/pmc/articles/PMC3780952/)  
386 [gov/pmc/articles/PMC3780952/](https://www.ncbi.nlm.nih.gov/pmc/articles/PMC3780952/).
- 387 [13] Peracchi, A. & Mozzarelli, A. Exploring and exploiting allostery: Models, evolution, and drug targeting.  
388 *Biochimica et Biophysica Acta (BBA) - Proteins and Proteomics* **1814**, 922–933 (2011). URL [http://www.](http://www.sciencedirect.com/science/article/pii/S1570963910002827)  
389 [sciencedirect.com/science/article/pii/S1570963910002827](http://www.sciencedirect.com/science/article/pii/S1570963910002827).
- 390 [14] Kenakin, T. & Miller, L. J. Seven transmembrane receptors as shapeshifting proteins: the impact of al-  
391 losteric modulation and functional selectivity on new drug discovery. *Pharmacological reviews* **62**, 265–304  
392 (2010). URL <https://pubmed.ncbi.nlm.nih.gov/20392808>[https://www.ncbi.nlm.nih.gov/pmc/](https://www.ncbi.nlm.nih.gov/pmc/articles/PMC2879912/)  
393 [articles/PMC2879912/](https://www.ncbi.nlm.nih.gov/pmc/articles/PMC2879912/).
- 394 [15] De Smet, F., Christopoulos, A. & Carmeliet, P. Allosteric targeting of receptor tyrosine kinases. *Nature*  
395 *Biotechnology* **32**, 1113–1120 (2014). URL <https://doi.org/10.1038/nbt.3028>.
- 396 [16] Christopoulos, A., May, L. T., Avlani, V. A. & Sexton, P. M. G-protein-coupled receptor allostery: the promise  
397 and the problem(s). *Biochemical Society Transactions* **32**, 873–877 (2004). URL [https://doi.org/10.1042/](https://doi.org/10.1042/BST0320873)  
398 [BST0320873](https://doi.org/10.1042/BST0320873).
- 399 [17] Fox, S. *et al.* High-Throughput Screening: Update on Practices and Success. *Journal of Biomolecular Screening*  
400 **11**, 864–869 (2006). URL <https://doi.org/10.1177/1087057106292473>.
- 401 [18] Andricopulo, A. D., Abraham, L. B. S. & J, D. Structure-Based Drug Design Strategies in Medicinal Chemistry  
402 (2009). URL <http://www.eurekaselect.com/node/85033/article>.

- 403 [19] Molek, P., Strukelj, B. & Bratkovic, T. Peptide phage display as a tool for drug discovery: targeting membrane  
404 receptors. *Molecules (Basel, Switzerland)* **16**, 857–887 (2011). URL <https://pubmed.ncbi.nlm.nih.gov/21258295><https://www.ncbi.nlm.nih.gov/pmc/articles/PMC6259427/>.
- 406 [20] Nussinov, R. & Tsai, C.-J. Allostery in Disease and in Drug Discovery. *Cell* **153**, 293–305 (2013). URL  
407 <https://doi.org/10.1016/j.cell.2013.03.034>.
- 408 [21] Hardy, J. A. & Wells, J. A. Searching for new allosteric sites in enzymes. *Current Opinion in Structural Biology* **14**,  
409 706–715 (2004). URL <http://www.sciencedirect.com/science/article/pii/S0959440X0400185X>.
- 410 [22] Erlanson, D. A., Wells, J. A. & Braisted, A. C. Tethering: Fragment-Based Drug Discovery. *Annual Review*  
411 *of Biophysics and Biomolecular Structure* **33**, 199–223 (2004). URL [https://doi.org/10.1146/annurev.  
412 biophys.33.110502.140409](https://doi.org/10.1146/annurev.biophys.33.110502.140409).
- 413 [23] Selvaratnam, R., Chowdhury, S., VanSchouwen, B. & Melacini, G. Mapping allostery through the covariance  
414 analysis of NMR chemical shifts. *Proceedings of the National Academy of Sciences* **108**, 6133 LP – 6138 (2011).  
415 URL <http://www.pnas.org/content/108/15/6133.abstract>.
- 416 [24] Oyen, D., Wechselberger, R., Srinivasan, V., Steyaert, J. & Barlow, J. N. Mechanistic analysis of allosteric  
417 and non-allosteric effects arising from nanobody binding to two epitopes of the dihydrofolate reductase of  
418 *Escherichia coli*. *Biochimica et Biophysica Acta (BBA) - Proteins and Proteomics* **1834**, 2147–2157 (2013). URL  
419 <http://www.sciencedirect.com/science/article/pii/S1570963913002823>.
- 420 [25] Rath, V. L. *et al.* Human liver glycogen phosphorylase inhibitors bind at a new allosteric site. *Chemistry & Biology*  
421 **7**, 677–682 (2000). URL <http://www.sciencedirect.com/science/article/pii/S1074552100000041>.
- 422 [26] Wright, S. W. *et al.* Anilinoquinazoline Inhibitors of Fructose 1,6-Bisphosphatase Bind at a Novel Allosteric Site:  
423 Synthesis, In Vitro Characterization, and X-ray Crystallography. *Journal of Medicinal Chemistry* **45**, 3865–3877  
424 (2002). URL <https://doi.org/10.1021/jm010496a>.
- 425 [27] Collier, G. & Ortiz, V. Emerging computational approaches for the study of protein allostery. *Archives of*  
426 *Biochemistry and Biophysics* **538**, 6–15 (2013). URL [http://www.sciencedirect.com/science/article/  
427 pii/S0003986113002324](http://www.sciencedirect.com/science/article/pii/S0003986113002324).
- 428 [28] Sheik Amamuddy, O. *et al.* Integrated Computational Approaches and Tools for Allosteric Drug Discovery.  
429 *International journal of molecular sciences* **21**, 847 (2020). URL <https://pubmed.ncbi.nlm.nih.gov/32013012><https://www.ncbi.nlm.nih.gov/pmc/articles/PMC7036869/>.
- 431 [29] Huang, Z. *et al.* ASD: a comprehensive database of allosteric proteins and modulators. *Nucleic Acids Research*  
432 **39**, D663–D669 (2010). URL <https://doi.org/10.1093/nar/gkq1022>.
- 433 [30] Huang, Z. *et al.* ASD v2.0: updated content and novel features focusing on allosteric regulation. *Nucleic Acids*  
434 *Research* **42**, D510–D516 (2013). URL <https://doi.org/10.1093/nar/gkt1247>.
- 435 [31] Shen, Q. *et al.* ASD v3.0: unraveling allosteric regulation with structural mechanisms and biological networks.  
436 *Nucleic Acids Research* **44**, D527–D535 (2015). URL <https://doi.org/10.1093/nar/gkv902>.
- 437 [32] Huang, W. *et al.* ASBench: benchmarking sets for allosteric discovery. *Bioinformatics* **31**, 2598–2600 (2015).  
438 URL <https://doi.org/10.1093/bioinformatics/btv169>.
- 439 [33] Zlobin, A., Suplatov, D., Kopylov, K. & Švedas, V. CASBench: A Benchmarking Set of Proteins with Annotated  
440 Catalytic and Allosteric Sites in Their Structures. *Acta naturae* **11**, 74–80 (2019). URL [https://pubmed.ncbi.  
441 nlm.nih.gov/31024751](https://pubmed.ncbi.nlm.nih.gov/31024751)<https://www.ncbi.nlm.nih.gov/pmc/articles/PMC6475866/>.
- 442 [34] Daura, X. Advances in the Computational Identification of Allosteric Sites and Pathways in Proteins BT - Protein  
443 Allostery in Drug Discovery. 141–169 (Springer Singapore, Singapore, 2019). URL [https://doi.org/10.  
444 1007/978-981-13-8719-7\\_7](https://doi.org/10.1007/978-981-13-8719-7_7).
- 445 [35] Huang, W. *et al.* Allosite: a method for predicting allosteric sites. *Bioinformatics* **29**, 2357–2359 (2013). URL  
446 <https://doi.org/10.1093/bioinformatics/btt399>.
- 447 [36] Chen, A. S.-Y. *et al.* A Random Forest Model for Predicting Allosteric and Functional Sites on Proteins. *Molecular*  
448 *Informatics* **35**, 125–135 (2016). URL <https://doi.org/10.1002/minf.201500108>.
- 449 [37] Fogha, J., Diharce, J., Obléd, A., Aci-Sèche, S. & Bonnet, P. Computational Analysis of Crystallization  
450 Additives for the Identification of New Allosteric Sites. *ACS Omega* **5**, 2114–2122 (2020). URL <https://doi.org/10.1021/acsomega.9b02697>.
- 452 [38] van Gunsteren, W. F. *et al.* Biomolecular Modeling: Goals, Problems, Perspectives. *Angewandte Chemie*  
453 *International Edition* **45**, 4064–4092 (2006). URL <https://doi.org/10.1002/anie.200502655>.

- 454 [39] Ghosh, A. & Vishveshwara, S. A study of communication pathways in methionyl- tRNA synthetase by molec-  
455 ular dynamics simulations and structure network analysis. *Proceedings of the National Academy of Sciences*  
456 *of the United States of America* **104**, 15711–15716 (2007). URL [https://pubmed.ncbi.nlm.nih.gov/](https://pubmed.ncbi.nlm.nih.gov/17898174https://www.ncbi.nlm.nih.gov/pmc/articles/PMC2000407/)  
457 [17898174https://www.ncbi.nlm.nih.gov/pmc/articles/PMC2000407/](https://pubmed.ncbi.nlm.nih.gov/17898174https://www.ncbi.nlm.nih.gov/pmc/articles/PMC2000407/).
- 458 [40] Shukla, D., Meng, Y., Roux, B. & Pande, V. S. Activation pathway of Src kinase reveals intermediate states  
459 as targets for drug design. *Nature Communications* **5**, 3397 (2014). URL [https://doi.org/10.1038/](https://doi.org/10.1038/ncomms4397)  
460 [ncomms4397](https://doi.org/10.1038/ncomms4397).
- 461 [41] Hollingsworth, S. A. & Dror, R. O. Molecular Dynamics Simulation for All. *Neuron* **99**, 1129–1143 (2018). URL  
462 <http://www.sciencedirect.com/science/article/pii/S0896627318306846>.
- 463 [42] Dierynck, I. *et al.* Binding kinetics of darunavir to human immunodeficiency virus type 1 protease explain the  
464 potent antiviral activity and high genetic barrier. *Journal of virology* **81**, 13845–13851 (2007).
- 465 [43] Dykeman, E. C. & Sankey, O. F. Normal mode analysis and applications in biological physics. *Journal of Physics:*  
466 *Condensed Matter* **22**, 423202 (2010). URL <http://dx.doi.org/10.1088/0953-8984/22/42/423202>.
- 467 [44] Case, D. A. Normal mode analysis of protein dynamics. *Current Opinion in Structural Biology* **4**, 285–290 (1994).  
468 URL <http://www.sciencedirect.com/science/article/pii/S0959440X94903212>.
- 469 [45] Bahar, I., Lezon, T. R., Bakan, A. & Shrivastava, I. H. Normal mode analysis of biomolecular structures: functional  
470 mechanisms of membrane proteins. *Chemical reviews* **110**, 1463–1497 (2010). URL [https://pubmed.ncbi.](https://pubmed.ncbi.nlm.nih.gov/19785456https://www.ncbi.nlm.nih.gov/pmc/articles/PMC2836427/)  
471 [nlm.nih.gov/19785456https://www.ncbi.nlm.nih.gov/pmc/articles/PMC2836427/](https://pubmed.ncbi.nlm.nih.gov/19785456https://www.ncbi.nlm.nih.gov/pmc/articles/PMC2836427/).
- 472 [46] Panjkovich, A. & Daura, X. Exploiting protein flexibility to predict the location of allosteric sites. *BMC*  
473 *Bioinformatics* **13**, 273 (2012). URL <https://doi.org/10.1186/1471-2105-13-273>.
- 474 [47] Panjkovich, A. & Daura, X. PARS: a web server for the prediction of Protein Allosteric and Regulatory Sites.  
475 *Bioinformatics* **30**, 1314–1315 (2014). URL <https://doi.org/10.1093/bioinformatics/btu002>.
- 476 [48] Greener, J. G. & Sternberg, M. J. E. AlloPred: prediction of allosteric pockets on proteins using normal mode pertur-  
477 bation analysis. *BMC Bioinformatics* **16**, 335 (2015). URL <https://doi.org/10.1186/s12859-015-0771-1>.
- 478 [49] Song, K. *et al.* Improved Method for the Identification and Validation of Allosteric Sites. *Journal of Chemical*  
479 *Information and Modeling* **57**, 2358–2363 (2017). URL <https://doi.org/10.1021/acs.jcim.7b00014>.
- 480 [50] Guarnera, E. & Berezovsky, I. N. Structure-Based Statistical Mechanical Model Accounts for the Causal-  
481 ity and Energetics of Allosteric Communication. *PLoS computational biology* **12**, e1004678–e1004678  
482 (2016). URL [https://pubmed.ncbi.nlm.nih.gov/26939022https://www.ncbi.nlm.nih.gov/pmc/](https://pubmed.ncbi.nlm.nih.gov/26939022https://www.ncbi.nlm.nih.gov/pmc/articles/PMC4777440/)  
483 [articles/PMC4777440/](https://pubmed.ncbi.nlm.nih.gov/26939022https://www.ncbi.nlm.nih.gov/pmc/articles/PMC4777440/).
- 484 [51] Tee, W.-V., Guarnera, E. & Berezovsky, I. N. Reversing allosteric communication: From detecting allosteric sites  
485 to inducing and tuning targeted allosteric response. *PLOS Computational Biology* **14**, e1006228 (2018). URL  
486 <https://doi.org/10.1371/journal.pcbi.1006228>.
- 487 [52] Putz, I. & Brock, O. Elastic network model of learned maintained contacts to predict protein motion. *PLOS ONE*  
488 **12**, e0183889 (2017). URL <https://doi.org/10.1371/journal.pone.0183889>.
- 489 [53] Amor, B. R., Schaub, M. T., Yaliraki, S. N. & Barahona, M. Prediction of allosteric sites and mediating interactions  
490 through bond-to-bond propensities. *Nature Communications* **7**, 1–13 (2016). URL [http://dx.doi.org/10.](http://dx.doi.org/10.1038/ncomms12477)  
491 [1038/ncomms12477](http://dx.doi.org/10.1038/ncomms12477).
- 492 [54] Delmotte, A., Tate, E. W., Yaliraki, S. N. & Barahona, M. Protein multi-scale organization through graph  
493 partitioning and robustness analysis: application to the myosin–myosin light chain interaction. *Physical Biology* **8**,  
494 55010 (2011). URL <http://dx.doi.org/10.1088/1478-3975/8/5/055010>.
- 495 [55] Amor, B., Yaliraki, S. N., Woscholski, R. & Barahona, M. Uncovering allosteric pathways in caspase-1 using  
496 Markov transient analysis and multiscale community detection. *Molecular BioSystems* **10**, 2247–2258 (2014).  
497 URL <http://dx.doi.org/10.1039/C4MB00088A>.
- 498 [56] Spielman, D. A. & Teng, S.-H. Nearly-Linear Time Algorithms for Graph Partitioning, Graph Sparsification, and  
499 Solving Linear Systems. In *Proceedings of the Thirty-Sixth Annual ACM Symposium on Theory of Computing*,  
500 STOC '04, 81–90 (Association for Computing Machinery, New York, NY, USA, 2004). URL [https://doi.](https://doi.org/10.1145/1007352.1007372)  
501 [org/10.1145/1007352.1007372](https://doi.org/10.1145/1007352.1007372).
- 502 [57] Kelner, J. A., Orecchia, L., Sidford, A. & Zhu, Z. A. A Simple, Combinatorial Algorithm for Solving SDD  
503 Systems in Nearly-Linear Time. In *Proceedings of the Forty-Fifth Annual ACM Symposium on Theory of*  
504 *Computing*, STOC '13, 911–920 (Association for Computing Machinery, New York, NY, USA, 2013). URL  
505 <https://doi.org/10.1145/2488608.2488724>.

- 506 [58] Hodges, M., Barahona, M. & Yaliraki, S. N. Allosterity and cooperativity in multimeric proteins: bond-to-  
507 bond propensities in ATCase. *Scientific Reports* **8**, 1–14 (2018). URL [http://dx.doi.org/10.1038/  
508 s41598-018-27992-z](http://dx.doi.org/10.1038/s41598-018-27992-z).
- 509 [59] Vianello, F. *Computational characterisation of protein interaction sites: from small ligand pockets to large domain  
510 interfaces*. Ph.D. thesis, Imperial College London (2020). URL <http://hdl.handle.net/10044/1/89838>.
- 511 [60] Strömich, L., Wu, N., Barahona, M. & Yaliraki, S. N. Allosteric Hotspots in the Main Protease of SARS-CoV-2.  
512 *bioRxiv* 2020.11.06.369439 (2020). URL <https://doi.org/10.1101/2020.11.06.369439>.
- 513 [61] Mersmann, S. *et al.* ProteinLens: a web-based application for the analysis of allosteric signalling on atomistic  
514 graphs of biomolecules. *Nucleic Acids Research* (2021). URL <https://doi.org/10.1093/nar/gkab350>.
- 515 [62] Vitagliano, L. *et al.* A potential allosteric subsite generated by domain swapping in bovine seminal ri-  
516 bonuclease11Edited by A. R. Fersht. *Journal of Molecular Biology* **293**, 569–577 (1999). URL [https:  
517 //www.sciencedirect.com/science/article/pii/S0022283699931583](https://www.sciencedirect.com/science/article/pii/S0022283699931583).
- 518 [63] Dey, S., Hu, Z., Xu, X. L., Sacchettini, J. C. & Grant, G. A. The Effect of Hinge Mutations on Effector Binding  
519 and Domain Rotation in Escherichia coli D-3-Phosphoglycerate Dehydrogenase. *Journal of Biological Chemistry*  
520 **282**, 18418–18426 (2007). URL <http://www.jbc.org/cgi/content/short/282/25/18418>.
- 521 [64] Lukacs, C. M. *et al.* The crystal structure of human muscle glycogen phosphorylase a with bound glucose  
522 and AMP: An intermediate conformation with T-state and R-state features. *Proteins: Structure, Function, and  
523 Bioinformatics* **63**, 1123–1126 (2006). URL <https://doi.org/10.1002/prot.20939>.
- 524 [65] Ciaccio, C., Coletta, A., De Sanctis, G., Marini, S. & Coletta, M. Cooperativity and allosterity in haemoglobin  
525 function. *IUBMB Life* **60**, 112–123 (2008). URL <https://doi.org/10.1002/iub.6>.
- 526 [66] Suplatov, D. & Švedas, V. Study of Functional and Allosteric Sites in Protein Superfamilies. *Acta naturae* **7**,  
527 34–45 (2015). URL [https://pubmed.ncbi.nlm.nih.gov/26798490https://www.ncbi.nlm.nih.gov/  
528 pmc/articles/PMC4717248/](https://pubmed.ncbi.nlm.nih.gov/26798490https://www.ncbi.nlm.nih.gov/pmc/articles/PMC4717248/).
- 529 [67] Wood, Z. A., Weaver, L. H., Brown, P. H., Beckett, D. & Matthews, B. W. Co-repressor Induced Order  
530 and Biotin Repressor Dimerization: A Case for Divergent Followed by Convergent Evolution. *Journal of  
531 Molecular Biology* **357**, 509–523 (2006). URL [https://www.sciencedirect.com/science/article/pii/  
532 S0022283605016426](https://www.sciencedirect.com/science/article/pii/S0022283605016426).
- 533 [68] Song, F., Barahona, M. & Sophia, Y. N. BagPyPe: A Python package for the construction of atomistic,491energy-  
534 weighted graphs from biomolecular structures. *Manuscript in preparation* (2020).
- 535 [69] Word, J., Lovell, S. C., Richardson, J. S. & Richardson, D. C. Asparagine and glutamine: using hydrogen atom  
536 contacts in the choice of side-chain amide orientation11Edited by J. Thornton. *Journal of Molecular Biology* **285**,  
537 1735–1747 (1999). URL <http://www.sciencedirect.com/science/article/pii/S0022283698924019>.
- 538 [70] Huheey, J. E., Keiter, E. A., Keiter, R. L. & Medhi, O. K. *Inorganic chemistry: principles of structure and  
539 reactivity* (Pearson Education India, 2006).
- 540 [71] Lin, M. S., Fawzi, N. L. & Head-Gordon, T. Hydrophobic Potential of Mean Force as a Solvation Function for  
541 Protein Structure Prediction. *Structure* **15**, 727–740 (2007). URL [https://doi.org/10.1016/j.str.2007.  
542 05.004](https://doi.org/10.1016/j.str.2007.05.004).
- 543 [72] Mayo, S. L., Olafson, B. D. & Goddard III, W. A. DREIDING: A generic force field for molecular simulations.  
544 *Journal of Physical Chemistry; (USA)* **94** (1990).
- 545 [73] Hunter, C. A. & Sanders, J. K. M. The nature of  $\pi$ - $\pi$  interactions. *Journal of the American Chemical Society*  
546 **112**, 5525–5534 (1990). URL <https://doi.org/10.1021/ja00170a016>.
- 547 [74] Schaub, M. T., Lehmann, J., Yaliraki, S. N. & Barahona, M. Structure of complex networks: Quantifying  
548 edge-to-edge relations by failure-induced flow redistribution. *Network Science* **2**, 66–89 (2014). URL [https:  
549 //doi.org/10.1017/nws.2014.4](https://doi.org/10.1017/nws.2014.4).
- 550 [75] Biggs, N., Biggs, N. L. & Norman, B. *Algebraic graph theory*, vol. 67 (Cambridge university press, 1993).
- 551 [76] Lambiotte, R., Delvenne, J. & Barahona, M. Random Walks, Markov Processes and the Multiscale Modular  
552 Organization of Complex Networks. *IEEE Transactions on Network Science and Engineering* **1**, 76–90 (2014).
- 553 [77] Koenker, R. & Hallock, K. F. Quantile Regression. *Journal of Economic Perspectives* **15**, 143–156 (2001). URL  
554 <https://doi.org/10.1257/jep.15.4.143>.
- 555 [78] Efron, B. & Tibshirani, R. *An introduction to the bootstrap* (Chapman and Hall/CRC, New York, NY, United  
556 States, 1994), 1st editio edn.
